RESEARCH ARTICLE

# The signal peptide-like segment of hpaXm is required for its association to the cell wall in transgenic tobacco plants

Le Li<sup>1,2</sup>, Weiguo Miao<sup>1,2\*</sup>, Wenbo Liu<sup>1,2</sup>, Shujian Zhang<sup>3</sup>

**1** College of Environment and Plant Protection, Hainan University, Haikou, Hainan Province, China,

**2** Hainan Key Laboratory for Sustainable Utilization of Tropical Bioresource, Haikou, Hainan Province, China,

**3** U.S. Horticultural Research Laboratory, USDA-ARS, Fort Pierce, Florida, United States of America

\* [miao@hainu.edu.cn](mailto:miao@hainu.edu.cn)

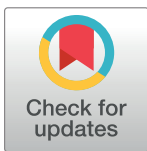

## Abstract

Harpins, encoded by *hrp* (hypersensitive response and pathogenicity) genes of Gram-negative plant pathogens, are elicitors of hypersensitive response (HR). HpaXm is a novel harpin-like protein described from cotton leaf blight bacteria, *Xanthomonas citri* subsp. *malvacearum*—a synonym of *X. campestris* pv. *malvacearum* (Smith 1901–1978). A putative signal peptide (1-MNSLNTQIGANSSFL-15) of hpaXm was predicted in the nitroxyl-terminal (N-terminal) by SignalP (SignalP 3.0 server). Here, we explored the function of the N-terminal leader peptide like segment of hpaXm using transgenic tobacco (*Nicotiana tabacum* cv. Xanthi nc.). Transgenic tobacco lines expressing the full-length *hpaXm* and the signal peptide-like segment-deleted mutant *hpaXmΔLP* were developed using transformation mediated by *Agrobacterium tumefaciens*. The target genes were confirmed integrated into the tobacco genomes and expressed normally. Using immune colloidal-gold detection technique, hpaXm protein was found to be transferred to the cytoplasm, the cell membrane, and organelles such as chloroplasts, mitochondria, and nucleus, as well as the cell wall. However, the deletion mutant *hpaXmΔLP* expressed in transgenic tobacco was found unable to cross the membrane to reach the cell wall. Additionally, soluble proteins extracted from plants transformed with *hpaXm* and *hpaXmΔLP* were bio-active. Defensive micro-HR induced by the transgene expression of hpaXm and hpaXmΔLP were observed on transgenic tobacco leaves. Disease resistance bioassays to tobacco mosaic virus (TMV) showed that tobacco plants transformed with *hpaXm* and with *hpaXmΔLP* exhibited enhanced resistance to TMV. In summary, the N-terminal signal peptide-like segment (1–45 bp) in *hpaXm* sequence is not necessary for transgene expression, bioactivity of hpaXm and resistance to TMV in transgenic tobacco, but is required for the protein to be translocated to the cell wall.

## OPEN ACCESS

**Citation:** Li L, Miao W, Liu W, Zhang S (2017) The signal peptide-like segment of hpaXm is required for its association to the cell wall in transgenic tobacco plants. PLoS ONE 12(1): e0170931. doi:10.1371/journal.pone.0170931

**Editor:** Leandro Peña, Instituto de Biología Molecular y Celular de Plantas, SPAIN

**Received:** July 27, 2016

**Accepted:** January 12, 2017

**Published:** January 31, 2017

**Copyright:** This is an open access article, free of all copyright, and may be freely reproduced, distributed, transmitted, modified, built upon, or otherwise used by anyone for any lawful purpose. The work is made available under the [Creative Commons CC0](https://creativecommons.org/licenses/by/4.0/) public domain dedication.

**Data Availability Statement:** The data sets supporting the results of this article are included within the article and its additional files. The microarray data supporting the results of this article are available in the NCBI's Gene Expression Omnibus repository, and are accessible through GenBank accession numbers DQ643828 (<http://www.ncbi.nlm.nih.gov/nuccore/109648387>), AF485783 (<http://www.ncbi.nlm.nih.gov/nuccore/AF485783>), and AJ223969 (<http://www.ncbi.nlm.nih.gov/nuccore/AJ223969>).

## Introduction

Harpins, encoded by hypersensitive response and pathogenicity (*hrp*) genes of Gram-negative plant-pathogenic bacteria, are glycine-rich, heat stable, cysteine-free, protease-sensitive, acidic

**Funding:** This work was supported by the National agricultural industrial technology system (CARS-34-GW8) to WM; National Natural Science Foundation of China under Grant (31360029,31160359) to WM; Doctoral Fund of Ministry of Education (20124601110004, 20104601110004) to WM; National Key Basic Research Plan of China (2011CB111612) to WM and the Research and start-up capital of Hainan University (kyqd1006) to WM. The funders had no role in study design, data collection and analysis, decision to publish, or preparation of the manuscript.

**Competing Interests:** The authors have declared that no competing interests exist.

**Abbreviations:** *Hrp*, Hypersensitive response and pathogenicity; *HR*, Hypersensitive response; *N-terminal*, Nitroxyl-terminal; *TMV*, Tobacco Mosaic Virus; *GST*, Glutathione S-transferase; *Sec*, Sec translocation; *Tat*, Twin-arginine translocation; *T2SS*, Type II secretion system.

proteins that share common characteristics [1]. They can induce hypersensitive response (HR) and systemic acquired resistance in non-host plants through exogenous application [2]. It was reported that several harpins expressed in transgenic plants including tobacco, rice, and *Arabidopsis* induced host responses such as enhanced growth and drought tolerance [3–7]. According to their general characteristics, harpins are categorized into four major groups based on their protein similarity and domain structures: HrpN, HrpZ1, HrpW1, and Hpa1 groups [1]. HpaXm is a newly found harpin-like protein, cloned and identified from cotton leaf blight bacteria, *Xanthomonas citri* subsp. *malvacearum*—a synonym of *X. campestris* pv. *malvacearum* (Smith 1901–1978). Based on its composition of amino acids and other characteristics, hpaXm was distinct from other harpins and was classified into a new group [1]. Previous works showed that hpaXm was capable of inducing HR in plants and enhancing resistance to tobacco mosaic virus (TMV) in tobacco when infiltrated into the leaf apoplast using purified protein [8].

Over the last few decades, it was found that most harpins travel through the type III secretion system in pathogens. The translocation of some type III secretion effectors into plant cells relies on the effector targeting signal that generally resides in the nitroxyl-terminal (N-terminal) domain [9–10]. In general, studies on the N-terminal function of harpins have been mainly described in bacteria, including several plant pathogenic bacteria, and have focused on the regions responsible for eliciting the HR reaction or controlling systemic resistance. For example, a conserved N-terminal region consisting of 12 highly hydrophilic amino acids (QGI-SEKQLDQLL) played a critical role in protein aggregation and inclusion body formation in harpins from *Xanthomonas* [11]. Additionally, the dual effect depends on plants' sensing of the N-terminal region in the Hpa1 sequence [12–13], as the region of 10–42 residues (Hpa1<sub>10–42</sub>) in the Hpa1 sequence is 1.3–7.5-fold more effective than the full length in inducing plant resistance [13–16]. However, in tobacco, Hpa1<sub>10–42</sub> is near 30-fold less active than Hpa1 in eliciting hypersensitive cell death (HCD) [16–17]. Previous works regarding the function of the N-terminal amino acids of different harpins revealed that the N-terminal leader peptide of several harpins is critical for their efficacy [1,18–19]. But there was few research on the relationship between the N-terminal amino acids of harpin and its translocation in plant tissues.

In particular, signalP (SignalP 3.0 server; <http://www.cbs.dtu.dk/services/SignalP/>) prediction suggested that a putative signal peptide of hpaXm located in the N-terminal leader peptide (1-MNSLNTQIGANSSFL-15). Furthermore, glutathione S-transferase (GST) trap test indicated that hpaXm was released into the extra-cellular medium, and hpaXmΔLP (the mutation of the N-terminal signal peptide-like segment deletion hpaXm) recombinant protein was unable to be secreted outside cells but still elicited a HR reaction in tobacco leaves [8, 20–22]. The exogenously expressed protein involving a cleavable N-terminal signal peptide, which is cleaved off during translocation across the cytoplasmic membrane via the Sec translocation (Sec) or twin-arginine translocation (Tat) machinery [23–24], is thought to be exported by the Type II secretion system (T2SS) [23]. The presumed signal peptide suggested that hpaXm was probably distinct from other harpins, probably transported with T2SS [1,20–22]. Previous works [8] showed that the leader peptide (1-MNSLNTQIGANSSFL-15) in the N-terminal region of hpaXm was probably the key factor relating to the hpaXm's pathogenicity capability, association sites with host or non-host plant tissues, intracellular secretion and translocation in bacteria. Therefore, previous studies on the function of the leader peptide in the N-terminal region of hpaXm have mainly targeted bacteria such as *Xanthomonas* pathogens or *E. coli*. [20]. Whether or not the N-terminal leader peptide influences the trans-gene expression of hpaXm in transgenic plants remains unclear.

Another consideration is the association sites of hpaXm with plants, especially the trans-gene expression of hpaXm in plants. It was shown that translocator proteins in animal

pathogenic bacteria can form a channel-like structure in the host plasma membrane by oligomerization [1, 25]. For example, HrpZ1 from *Pseudomonas syringae* pv. *phaseolicola* was shown to be associated with liposomes and synthetic bilayer membranes [26]. Moreover, PopA1 from *Ralstonia solanacearum* was shown to be integrated into liposomes and membranes of *Xenopus laevis* oocytes, resulting in the formation of ion-conducting pores [27]. However, it was reported that PopW could target the plant cell wall and bind to calcium pectate [28]. Harpin<sub>Xoo</sub> expressed in transgenic cotton plants was also found to be associated with the cell wall [21–22]. Although some studies have suggested that several harpins were associated with plant cell membranes, as they could bind to lipids and form pores in the plant, the association sites of harpins in transgenic plants remain controversial. Whether or not the N-terminal regions of harpins influence the association sites, the interaction sites and the translocation of harpins in plants also remains unclear.

In this work, we studied the full-length hpaXm and the signal peptide-like segment-deleted mutant hpaXm $\Delta$ LP using transgenic tobacco plants. Transgenic tobacco expressing hpaXm or hpaXm $\Delta$ LP genes were developed and the bio-activity of the extracted soluble proteins, resistance to TMV of transgenic tobacco plant were determined. Our results suggested that the N-terminal signal peptide-like segment of hpaXm is not necessary for the bioactivity of hpaXm and its function in disease resistance to TMV in transgenic tobacco, but is required for the protein to be translocated to the cell wall.

## Materials and methods

### Plants and microbes

Tobacco (*N. tabacum*) cv. Xanthi nc and its transgenic lines were grown in a greenhouse for 38 days before use, except specified elsewhere. TMV was maintained in an aqueous solution of 18 mg ml<sup>-1</sup> at 4°C. *Agrobacterium tumefaciens* strain LBA4404, harboring the binary vector pBI121 [29], was used in construction of the transformation units. The *E. coli* strain BL21 (DE3), containing the prokaryotic expression vector BL21/pGEX-hpaXm [20], was used to prepare active control protein hpaXm. Purified protein of hpaXm was lyophilized and maintained at -80°C. Bacteria were multiplied before use as previously described [29–31].

### Generation of transgenic plants

A full-length and the N-terminal leader peptide deleted mutant of hpaXm gene were excised from BL21/pGEX-hpaXm and inserted into pBI121 between the CaMV 35S promoter and the  $\beta$ -glucuronidase gene *uidA* by digestion with restriction enzymes *Xba*I and *Xma*I and ligation with T4 DNA ligase [32]. The resulting pBI-hpaXm and pBI-hpaXm $\Delta$ LP constructs were sequenced to verify the correct orientation of genes and were transferred into *A. tumefaciens* LBA4404 using the standard freeze-thaw protocol [33]. Tobacco was transformed with pBI-hpaXm, pBI-hpaXm $\Delta$ LP, or pBI121 by soaking leaf disks with the appropriate *A. tumefaciens* suspensions [20]. Tissue culture and plant regeneration were done as previously described [32]. Seed from the T<sub>0</sub> and T<sub>1</sub> generations were screened on Murashige and Skoog (MS) agar medium [30] in the presence of kanamycin at 150  $\mu$ g ml<sup>-1</sup> [34–35]. After genomic integration, expression, and production of the target genes in transgenic plants were determined, the hpaXm- and hpaXm $\Delta$ LP-expressing tobacco plants were compared with untransformed plants in height and weight of the entire plant, weight and size of leaves, and flowering time. Plants containing the vector pBI121 only were similarly selected and designated as Vec lines.

### Nucleic acid manipulation

Standard protocols [32,36] were used. RNA and genomic DNA were isolated from leaves. PCR and DNA blot analyses were conducted for integration of *hpaXm* and *hpaXmΔLP* into tobacco genomes. Expression of the trans-gene and defense-related genes were studied by reverse transcription (RT)-PCR or RNA gel blot analyses. The *hpaXm* and *hpaXmΔLP* cDNA used as probes in DNA and RNA blot analyses were produced by PCR from *E. coli* strain BL21/pGEX-*hpaXm*. Sequences of PCR and RT-PCR products were confirmed as described [37]. Various nucleic acids were fractionated by electrophoresis in agarose gels and visualized by staining with ethidium bromide, using DL2000 markers (Takara Biotech Co., Dalian, China) to indicate size. In Southern blot hybridization, 3 μg of genomic DNA was digested with *EcoRI* and *BamHI* prior to electrophoresis and, after that, blotted to nylon membranes. Replicates of blots were hybridized with a digoxigenin-labeled *hpaXm* probe [36]. PCR was conducted for 30 cycles using 3 μg of genomic DNA as a template and specific primers, producing an intact *hpaXm* sequence and an intact *hpaXmΔLP* sequence, respectively. For RT-PCR, reaction conditions were optimized for each gene [37]. RNA (2 μg) was treated with RNase-free DNase and used as template to synthesize the first-strand cDNA. An equal volume of cDNA was amplified for 30 cycles using specific primers (Table 1). The *EF1a* gene was used as a standard and amplified with specific primers, resulting in a 495-bp product [37]. Products were quantified in gels by a scanner attached to an Image System (SX-100; Shanghai Sixing Biol. Tech. Co., Shanghai, China).

### Protein analysis and micro-HR observation

Soluble proteins were isolated from leaves as described [38] with several modifications. The protease inhibitor phenyl-methylsulfonyl fluoride (PMSF), which protects harpins from destruction by proteases [39], was applied at 0.1 mmol l<sup>-1</sup> to the protein extraction solution. Supernatants from centrifuging (25,000 × g for 25 min at 4°C) leaf homogenates were heated in a boiling water bath for 10 min, cooled to room temperature, and centrifuged similarly. The second supernatants were supplemented with PMSF and maintained overnight at -4°C. After centrifuging, the third supernatants were lyophilized and maintained at -80°C. The protein preparations were tested for bioactivity in aqueous solutions. Purified proteins were resolved by SDS-PAGE. Proteins were also isolated from intercellular spaces of leaves, as described [39] in the presence of PMSF, lyophilized, and maintained as above. Partial aqueous solutions of the protein preparations were heated in a boiling water bath for 10 min, while another part remained untreated; both were tested for bioactivity and resolved by a native PAGE.

**Table 1. Information of genes and primers for PCR analyses.**

| Gene            | Accession No. | Primer Sequence                                  | Product Size |
|-----------------|---------------|--------------------------------------------------|--------------|
| <i>hpaXm</i>    | DQ643828      | 5' - <u>GCTCTAGA</u> AATGAATCTTTGAACACACAGA -3'  | 420 bp       |
|                 |               | 5' -TCCCCCGGGTTACTGCATCGATCCGGTGT -3'            |              |
| <i>hpaXmΔLP</i> | DQ643828      | 5' - <u>GCTCTAGA</u> AATGCAGGTCGACCCGAGCCAGA -3' | 360 bp       |
|                 |               | 5' -TCCCCCGGGTTACTGCATCGATCCGGTGT -3'            |              |
| <i>35S</i>      | AF485783      | 5' -gccttttcaatttcagaaagaatgc -3'                | 800 bp       |
|                 |               | 5' -ttatatagaggaagggctcttgcaa -3'                |              |
| <i>EF1a</i>     | AJ223969      | 5' -AGACCACCAAGTACTACTGCAC -3'                   | 495bp        |

Note: Restriction site are underlined.

doi:10.1371/journal.pone.0170931.t001

Bioactivity of the two types of plant proteins was boiled for 10 min [20] and evaluated, in comparison with hpaXm proteins [40] from *E. coli* strain BL21/pGEX-hpaXm, based on the occurrence of HR in tobacco leaves infiltrated with each of protein preparations at  $100 \mu\text{g ml}^{-1}$ , a concentration sufficient for the response [37].

Micro-HR was monitored based on observing dead cells after staining leaves with lactophenol trypan blue [37, 41–42]. Briefly, 1.5-cm squares of tobacco leaves were placed in lactophenol trypan blue solution, composed of 10 ml of lactic acid (85% aqueous), 10 ml of water saturated phenol, 10 ml of glycerol (98%), 10 ml of distilled water, and 15 mg of trypan blue. The dye solution was infiltrated into the leaf intercellular spaces with the aid of a vacuum pump and a bell jar. The infiltrated tissues were then heated in a boiling water bath for 5–10 min and incubated at room temperature for 6–8 h. Stained leaf tissues were cleared in chloral hydrate solution ( $2.5 \text{ g ml}^{-1}$ ) overnight or until tissues were clear. To determine whether both responses spontaneously occurred in transgenic lines, every third leaf on the plants was investigated similarly at 10-d intervals until flowering.

### Disease scoring

TMV was maintained in an aqueous solution ( $18 \text{ mg ml}^{-1}$ ) at  $4^\circ\text{C}$  [29]. Plants were inoculated respectively with TMV at 38 days after transplanting plants to soil. Inoculation was performed for TMV ( $100 \mu\text{L}$ ;  $18 \mu\text{g ml}^{-1}$  of solution) by rubbing leaves using a finger in the presence of abrasive diatomaceous earth on each of six sites of tobacco leaf surfaces [5, 29, 43]. Inoculated plants were grown in a greenhouse maintained at room temperature ( $20^\circ\text{C}$ – $23^\circ\text{C}$ ) and investigated for infection 7 d later [3, 29].

For plants inoculated with TMV, the number and size of lesions on leaves were determined. Disease severity (DS) was expressed as number of lesions per leaf for TMV. Correspondingly, resistance was given as percent decrease of DS in transgenic plants, relative to that in untransformed or Vec plants, quantified using the formula  $100 \times (\text{mean DS in control plants} - \text{mean DS in transgenic plants}) / \text{mean DS in the control}$  [3].

### Statistical analysis

Assays were conducted three times, each involving 20 plants, except if specified in figure captions. For all quantitative determinations, data were analyzed by Duncan's multiple range test at  $P \leq 0.01$  [3]. For differences in DS, each transgenic line was compared with Vec plants; T1-101-3 line, T1-103-5 line, and V35 line were also subjected to multiple comparisons.

### Immune colloidal-gold testing

Polyclonal antibody (pAb) against hpaXm were customized from Abmart Company (Shanghai, China), by injecting two New Zealand white rabbits respectively with the purified ( $\geq 3 \text{ mg}$ ) hpaXm protein [20] for three times at 2–3-week intervals. Blood containing the antiserum was collected 2 weeks after the final injection.

Colloidal-gold was preserved in our laboratory. Leaf samples of the tested transgenic lines expressing the full-length and the N-terminal leader peptide deleted mutant of *hpaXm* were fixed, washed, dehydrated, penetrated, embedded, and polymerized, with the tested vector-expressing transgenic line as control [20, 44]. Then the leaf samples were cut into about 6-nm-thick slices and adsorbed on copper web under the ultramicrotome of Leica-EM UC7 [18, 44]. Copper webs containing the leaf samples were moist, closed, and incubated with the diluted hpaXm-pAb twice [18, 44]. After being washed and dyed, copper webs were observed under a Hitachi H-7650 electron microscope [18, 44]. All tested samples of each group were repeated at least twice.

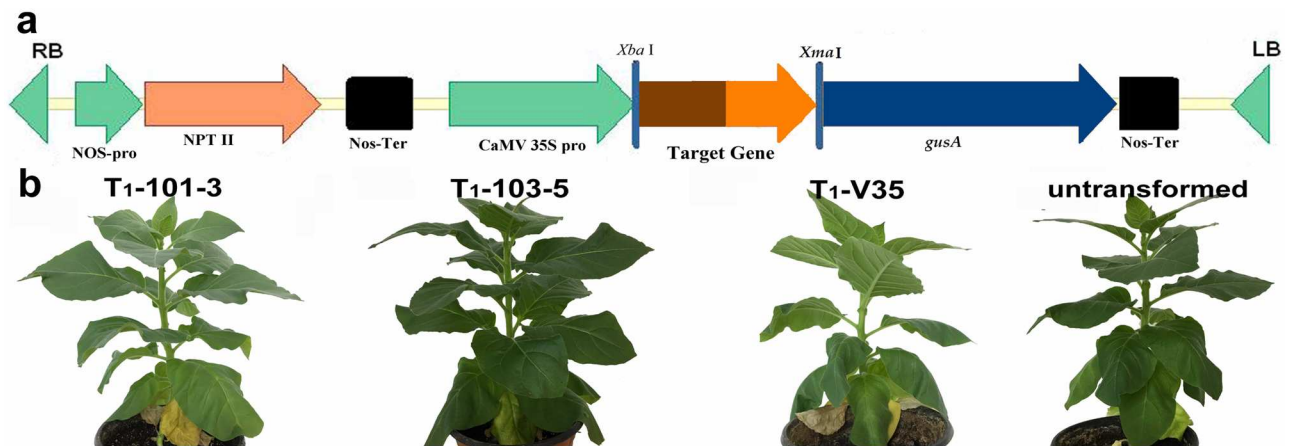

**Fig 1. Generation of transgenic tobacco expressing the full-length or the signal peptide-like segment of hpaXm.** **a)** The transformation unit *pBI-HpaXm* or *pBI-HpaXm $\Delta$ LP* constructed in the vector pBI121. Labels on the bottom include the kanamycin-resistant gene *NPT II*, the *35S* promoter, and target gene the full-length *hpaXm* (420 bp) or the N-terminal leader peptide (1-MNSLNTQIGANSSFL-15) deletion mutant *hpaXm $\Delta$ LP* (357 bp). Those on top are restriction sites *Xba*I and *Xma*I. **b)** Morphological comparison among T<sub>1</sub> plants of the *hpaXm*-expressing tobacco (T<sub>1</sub>-101-3), the *hpaXm $\Delta$ LP*-expressing tobacco (T<sub>1</sub>-103-5), the Vec-expressing tobacco (T<sub>1</sub>-V35), and the parent untransformed plants. All the experiments each involving 15 plants gave similar results at least.

doi:10.1371/journal.pone.0170931.g001

## Results

### The exogenous genes were integrated into genomes and expressed normally at the transcriptional level

The *hpaXm* and *hpaXm $\Delta$ LP* genes were introduced into tobacco (*Nicotiana tabacum* cv. Xanthi nc.) plants by *Agrobacterium*-mediated transformation. In our previous studies, *Agrobacterium* transformants containing the pBI121::*hpaXm* and pBI121::*hpaXm $\Delta$ LP* vectors were constructed [45] (Fig 1a). Screening of T<sub>0</sub> and T<sub>1</sub> seed of transgenic tobacco containing the *hpaXm* and *hpaXm $\Delta$ LP* gene vectors resulted in 35 lines possibly containing *hpaXm* and 43 possibly containing *hpaXm $\Delta$ LP*. Transformation with the vector pBI121 only and similar screening produced 10 Vec lines.

The *hpaXm* and *hpaXm $\Delta$ LP* genes were analyzed by PCR, which produced a sequence 100% identical to that deposited in GenBank based on BLAST analyses. The *hpaXm* and *hpaXm $\Delta$ LP* sequences were detected in transformed callus, regenerated seedlings, and four independent randomly selected *hpaXm*-transgenic plants and four independent randomly selected *hpaXm $\Delta$ LP*-transgenic plants at various stages, but they were not detected in untransformed and Vec plants (Fig 2). Simultaneously the CaMV35S promoter sequence was detected in the randomly selected four independent *hpaXm*-transgenic plants and four *hpaXm $\Delta$ LP*-transgenic plants, and also in the vector-transformed controls, all of which acquired the predicted sizes around 800 bp (Fig 2). The sequencing results of the PCR-amplified products of the randomly selected transgenic lines, *hpaXm-101* and *hpaXm $\Delta$ LP-103*, showed that *hpaXm* and *hpaXm $\Delta$ LP* genes were 100% homologous to the published *hpaXm* sequence (GenBank accession no. **DQ643828**).

PCR-Southern hybridization showed that there was at least one copy in the randomly selected four independent *hpaXm $\Delta$ LP*-transgenic lines and four independent *hpaXm*-transgenic lines. Furthermore, genome Southern blot hybridization confirmed the results, and additionally revealed that one copies of the *hpaXm* trans-gene were present in the *hpaXm-101* transgenic line, and two copy of the *hpaXm $\Delta$ LP* trans-gene was present in the *hpaXm $\Delta$ LP-103* line. While the Vec control lines and the blank control of ddH<sub>2</sub>O had no visible hybridization bands (Fig 3).

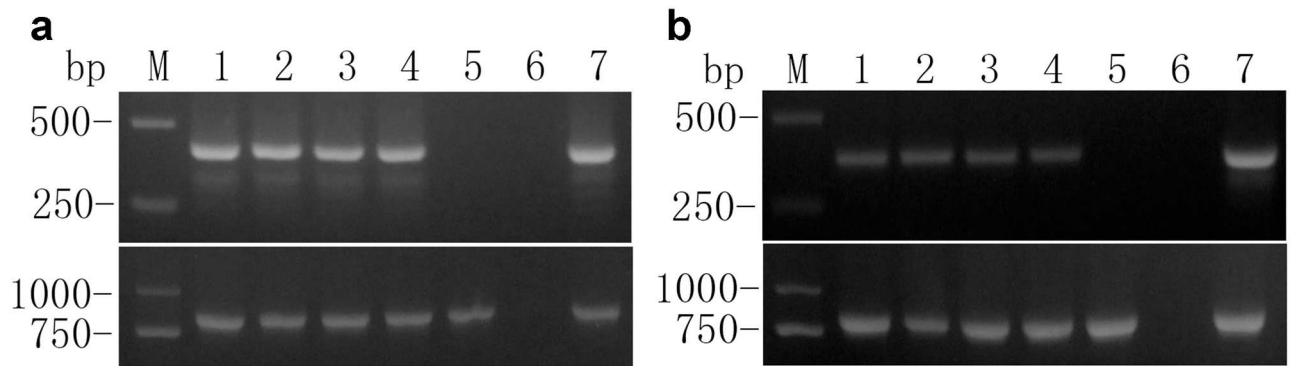

**Fig 2. PCR and CaMV35S promoter sequence analyses.** Lanes 1–4 are **a)** *hpaXm* coded on top and CaMV35S promoter coded on bottom from the genome of four randomly selected T<sub>1</sub> plants of *hpaXm*-transgenic lines and **b)** *hpaXmΔLP* coded on top and CaMV35S promoter coded on bottom from the genome of four randomly selected T<sub>1</sub> *hpaXmΔLP*-transgenic plants. Markers (M) are 2000, 1000, 750, and 500 bp. Lane 5 is a negative control of transgenic tobacco genomes with empty vector as template. Lane 6 is a blank control of ddH<sub>2</sub>O as template. Lane 7 is a positive control of plasmids **a)** pBI121::*hpaXmΔLP* **b)** pBI12::*hpaXm* as template.

doi:10.1371/journal.pone.0170931.g002

To determine whether the *hpaXm* and *hpaXmΔLP* inserts were transcribed, RT-PCR was applied to detect accumulation of *hpaXm* mRNA in the four independent randomly selected *hpaXm*-transgenic lines and *hpaXmΔLP* mRNA in the four independent randomly selected *hpaXmΔLP*-transgenic lines. The *EF1α* gene was used as a standard (Fig 4) because it is highly conserved and constitutively expressed in eukaryotes [46–47]. The sequences of RT-PCR products showed an identity of 100% for *hpaXm* to that deposited in GenBank (GenBank accession no. DQ643828) and 99% for *EF1α* to published sequences (GenBank accession no. DQ174258, 496 bp). Replicates of RT-PCR performance indicated that *hpaXm* and *hpaXmΔLP* were generated stably from T<sub>0</sub> to T<sub>1</sub> generation and expressed normally at the transcriptional level respectively (Fig 4).

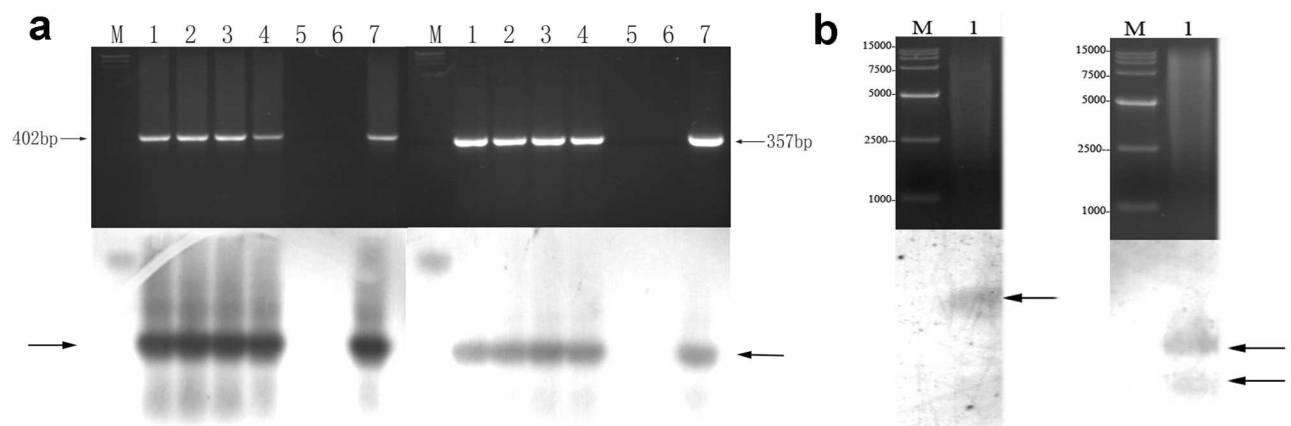

**Fig 3. PCR and Southern blot hybridization (bottom) analyses.** **a)** Comparison of PCR and PCR-Southern blot hybridization between the genomes of the full-length *hpaXm*-transgenic plants and the N-terminal leader peptide (1-MNSLNTQIGANSSFL-15) deletion mutant *hpaXmΔLP*-transgenic plants. Lanes 1–4 are four randomly selected T<sub>1</sub> plants of *hpaXm*-transgenic plants and of the *hpaXmΔLP*-transgenic plants. Lane 5 is the representative Vec transgenic plant T<sub>1</sub>-V35. Lane 6 is of the ddH<sub>2</sub>O as a template. Lane 7 is of the plasmids pBI121::*hpaXm* or pBI121::*hpaXmΔLP* as templates. **b)** Comparison of genomic Southern blot hybridization of representative transgenic plants T<sub>1</sub>-101-3 transformed with *hpaXm* gene (left) and T<sub>1</sub>-103-5 with *hpaXmΔLP* gene (right). Lanes 1 are the genomes digested by enzymes *EcoRI* and *BamHI* coded on top and the genomic Southern blot hybridization coded on bottom. Lane M are the markers. Note: The arrows indicate hybridizing bands.

doi:10.1371/journal.pone.0170931.g003

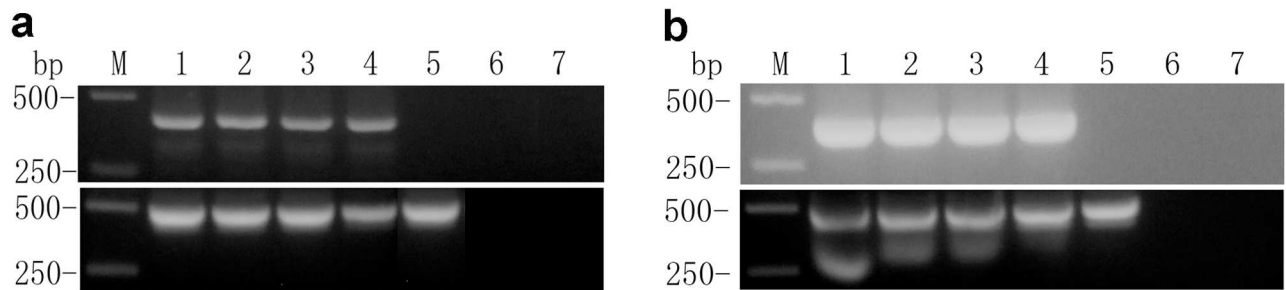

**Fig 4. Reverse transcriptional-PCR (RT-PCR) of T<sub>1</sub> transgenic lines.** Results of RT-PCR products detected the expression of the full-length *hpaXm* gene and the N-terminal leader peptide (1-MNSLNTQIGANSSFL-15) deletion mutant *hpaXmΔLP* gene in transgenic lines. Expression of *EFla* gene, a highly conserved and constitutively expressed gene in eukaryotes, used as a quantitative standard. Lane 1–4 are a) of four randomly selected *hpaXm*-transgenic plants and b) of four randomly selected *hpaXmΔLP*-transgenic plants. Lane 5 is the representative Vec transgenic plant T<sub>1</sub>-V35. Lane 6 are a) of the representative *hpaXm*-transgenic plants T<sub>1</sub>-101-3 and b) of the representative *hpaXmΔLP*-transgenic plants T<sub>1</sub>-103-5 without reverse transcriptase. Lane 7 are of ddH<sub>2</sub>O as template. Lane M are the markers.

doi:10.1371/journal.pone.0170931.g004

Based on height and weight of the entire plant, weight and size of leaves, and flowering time, these botanical traits of the *hpaXm*-expressing tobaccos, the *hpaXmΔLP*-expressing tobaccos and the Vec plants evidently resembled the untransformed plants (Fig 1b; and data not shown).

### Soluble proteins produced by transgenic tobacco lines expressing *hpaXm* and *hpaXmΔLP* both elicited HR on tobacco leaves

To determine the soluble proteins respectively produced by transgenic tobacco expressing the full-length and the signal peptide-like segment-deleted mutant of *hpaXm* genes, we compared sodium dodecyl sulfate–polyacrylamide gel electrophoresis (SDS-PAGE) gel patterns and bio-activity of soluble proteins from leaf tissues of untransformed plants, Vec, and transgenic lines. The putative HpaXm protein contained 133 amino acids, and the molecular mass was estimated to be 13.3 kDa [20]. The putative GST–HpaXm protein was about 35 kDa [20]. The results suggested that a purified protein from the transgenic line was abundant among total proteins and had the same size as *hpaXm* from *E. coli* (Fig 5). Similar results were obtained for *hpaXmΔLP* transgenic lines (Fig 5).

Note: Arrows indicated the foreign gene expressed proteins of transgenic tobacco. Based on the Bicinchoninic Acid (BCA) Assay method for protein quantitation [48], the protein concentration standard curve was derived through by absorbance of different concentrations of bovine serum albumin. And the protein concentrations were calculated according to the standard curve line  $Y = 74.9X - 11.7$ . Y: Protein concentration (μg/mL); X: Absorbance values (OD<sub>562</sub>)

We found that only proteins from transgenic plants were active, and extents of the HR they induced in tobacco leaves were comparable with that induced by *hpaXm* prepared regularly from the recombinant *E. coli* strain (Fig 6), even though the proteins were boiled for 10 min. Inversely, proteins isolated from untransformed or Vec plants did not cause the HR (Fig 6). These results demonstrated that either *hpaXm* or *hpaXmΔLP* was actively present in leaf tissues of transgenic plants.

### Defensive responses were induced in transgenic tobacco expressing *hpaXm* and *hpaXmΔLP*

We observed whole transgenic tobacco plants to determine whether the trans-gene expression of *hpaXm* induced a defensive response. There was no visible HR or macro-HR on *hpaXm* or



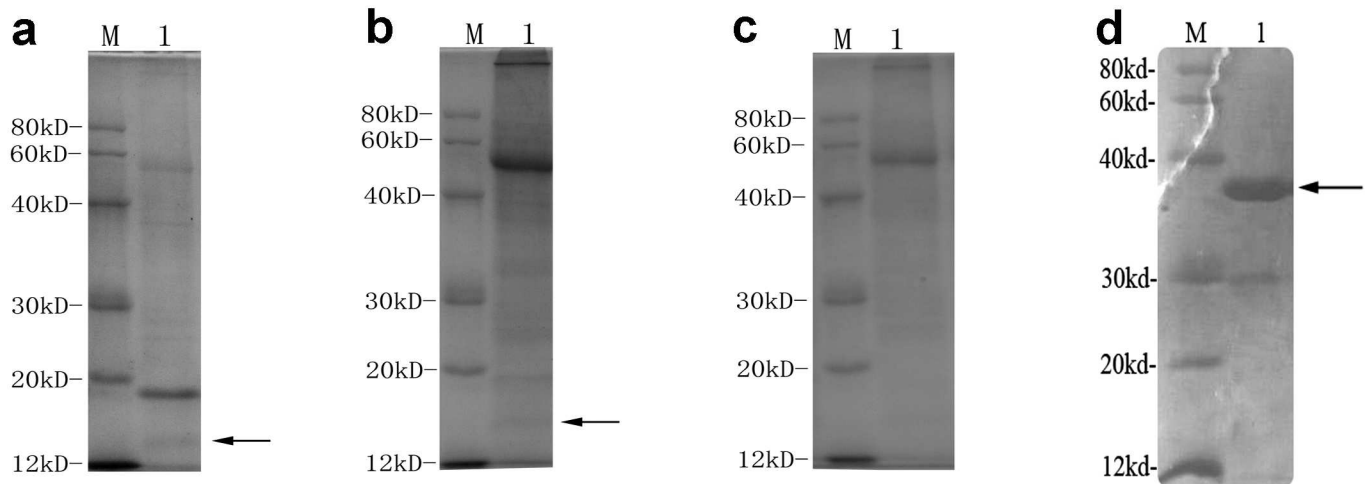

**Fig 5. Sodium dodecyl sulfate-polyacrylamide gel electrophoresis (PAGE) patterns of the above preparations.** a) Soluble protein preparations (1  $\mu$ L; 342ng) including hpaXm $\Delta$ LP from hpaXm $\Delta$ LP-expressing transgenic plant T<sub>1</sub>-103-5. b) Soluble protein preparations (1  $\mu$ L; 368ng) including hpaXm from hpaXm-expressing transgenic plant T<sub>1</sub>-101-3. c) Soluble protein preparations (1  $\mu$ L; 349.5ng) from Vec-expressing transgenic plant T<sub>1</sub>-V35. d) Purified hpaXm (1  $\mu$ L; 264ng) associated with a GST mark.

doi:10.1371/journal.pone.0170931.g005

hpaXm $\Delta$ LP transgenic tobacco leaf surfaces. However, after trypan blue staining, dark-blue micro-HRs of scattered necrotic cell clusters on leaf tissue were visible under the microscope, indicating that the trans-gene expressed hpaXm and hpaXm $\Delta$ LP produced micro-HR in transgenic tobacco to varying degrees (Fig 7). The results showed that the trans-gene expression of the full-length and the N-terminal signal peptide-like segment deficient mutant of hpaXm produced defensive responses with partial hypersensitive cell death in transgenic tobacco leaves.

Furthermore, we evaluated TMV resistance of transgenic lines. Size and numbers of brown spot lesions on leaves caused by TMV were markedly reduced in transgenic plants compared with controls (Fig 8). For example, size and numbers of brown spot lesions developed

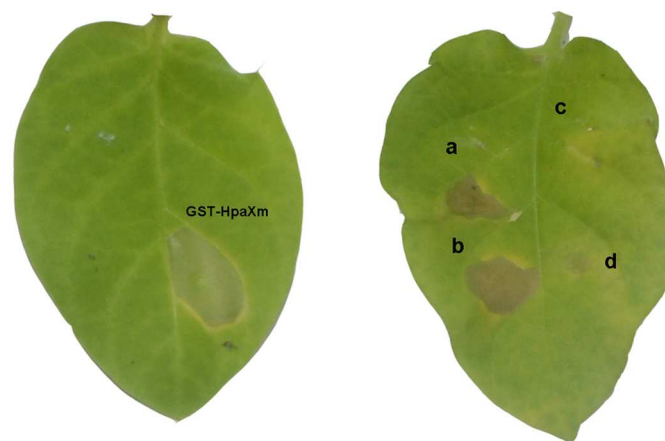

**Fig 6. Soluble proteins of the full-length and the signal peptide like segment deletion mutant of hpaXm both could stimulate HR.** Bioactivity assays of proteins from leaf tissues, compared with the preparations of GST-hpaXm (0.5  $\mu$ L; 0.13  $\mu$ g) from *E. coli* as control. T<sub>0</sub> and T<sub>1</sub> plants of hpaXm-expressing lines T<sub>0</sub>-1, T<sub>1</sub>-101-3, and T<sub>1</sub>-101-27, and hpaXm $\Delta$ LP-expressing lines T<sub>0</sub>-7, T<sub>1</sub>-103-5, and T<sub>1</sub>-103-29 were boiled and tested. Data from lines a) T<sub>1</sub>-101-3 (1  $\mu$ L; 0.37  $\mu$ g of boiled soluble-protein preparations) and b) T<sub>1</sub>-103-5 (1  $\mu$ L; 0.34  $\mu$ g of boiled soluble-protein preparations) are shown here. c) The Vec line in the T<sub>1</sub> generation T<sub>1</sub>-V35 (1  $\mu$ L; 0.35  $\mu$ g of boiled soluble-protein preparations) and d) PBS buffer (1  $\mu$ L) were tested as controls.

doi:10.1371/journal.pone.0170931.g006

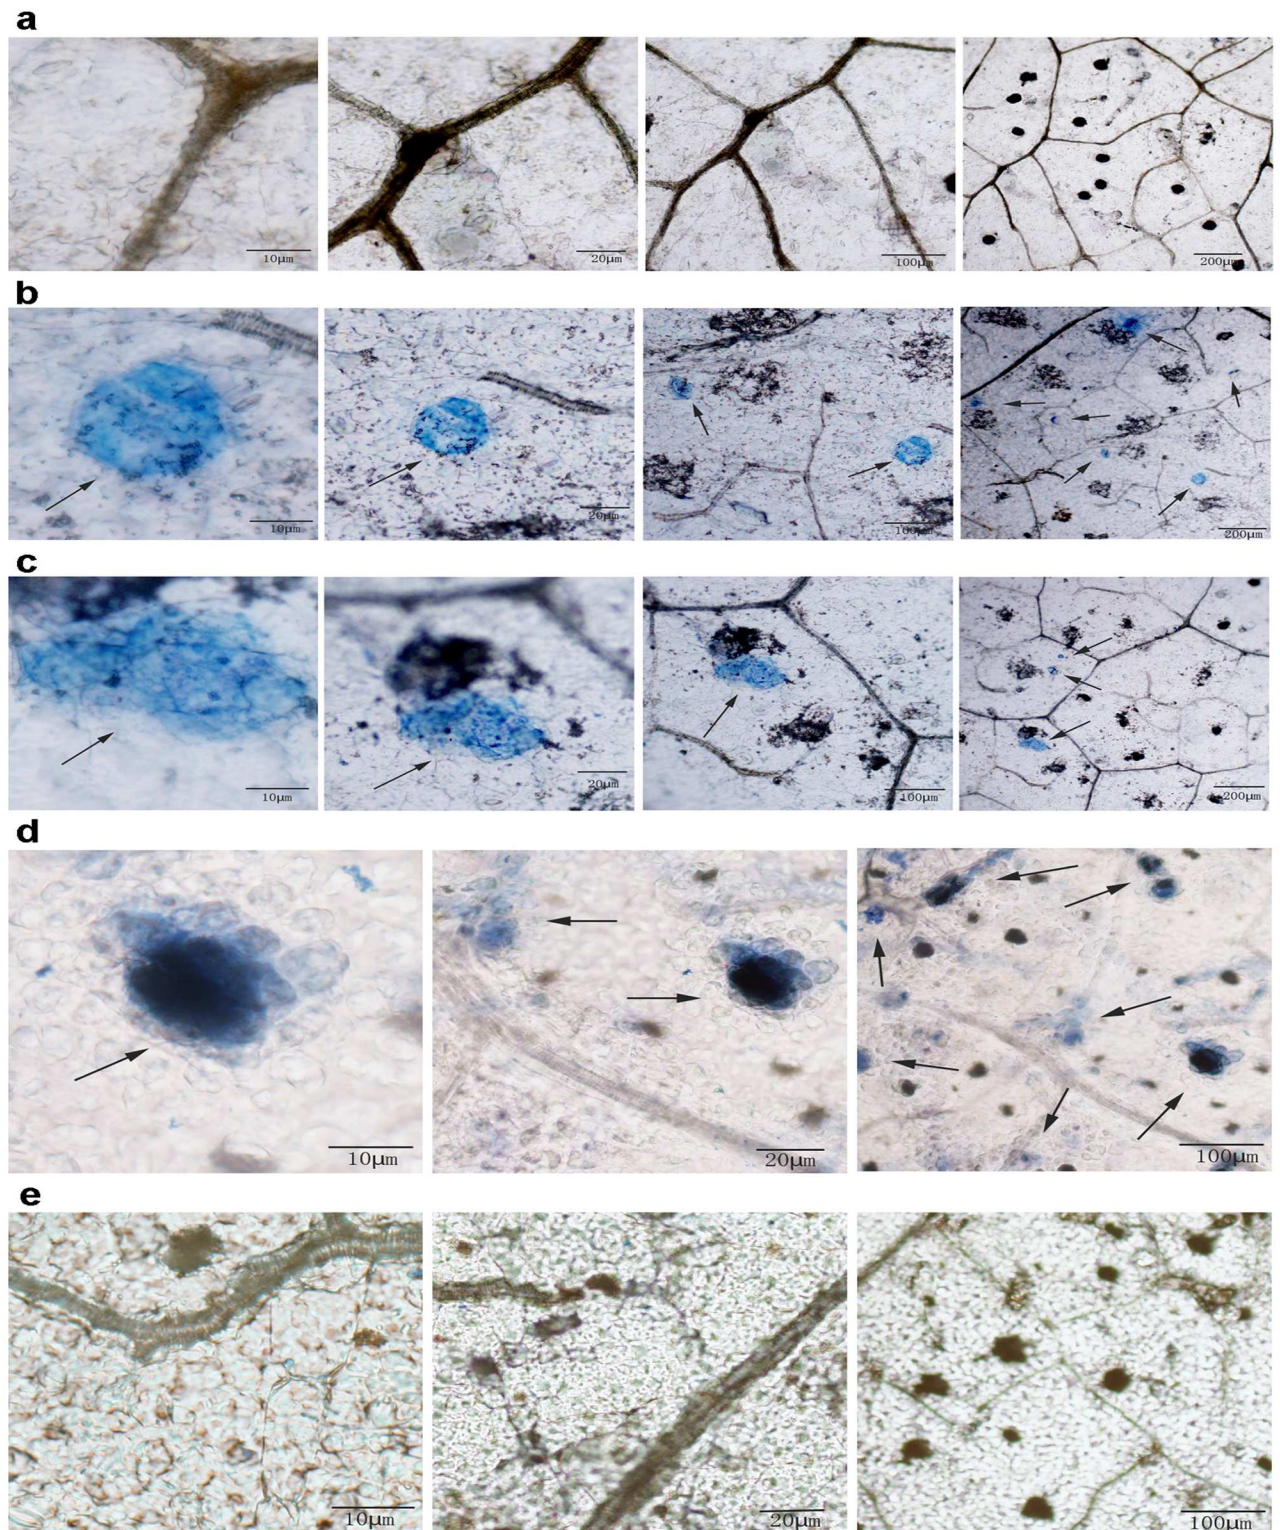

**Fig 7. Views of trypan blue-stained leaves of transgenic tobacco plants.** Micro-HRs were shown as areas stained blue. Tobacco leaf tissues of the tested transgenic lines, **a)** T<sub>1</sub>-V35 line expressing the vector pBI121, **b)** T<sub>1</sub>-101-3 line expressing the full-length *hpaXm*, and **c)** T<sub>1</sub>-103-5 line expressing the signal peptide-like segment-deletion mutant *hpaXmΔLP*, were stained and observed in the optical microscope under different magnifications. Untransformed tobacco leaf tissues **d)** with exogenous application of the *hpaXm* proteins as positive control and **e)** with no treatment as negative control were also stained and observed in the optical microscope under different magnifications. Projecting granular lipoglands were not related to any treatment. Note: The arrows indicate the occurrence of micro-HR dead cell clusters.

doi:10.1371/journal.pone.0170931.g007

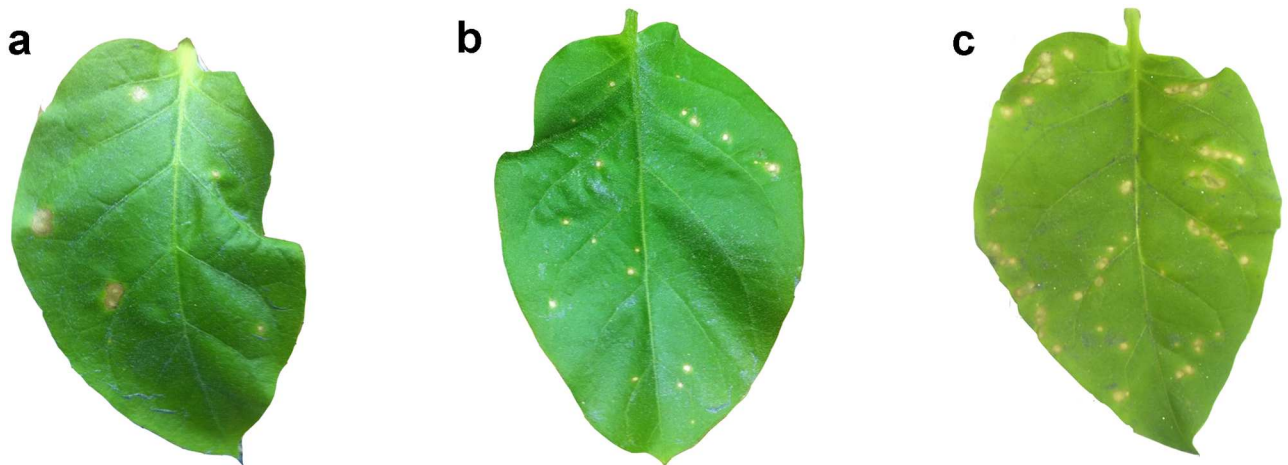

**Fig 8. Symptoms of transgenic plants inoculated with TMV.** Photographs of leaves inoculated with 1.8µg TMV, **a)** Leaves of the full-length *hpaXm* transformed line T<sub>1</sub>-101-3, **b)** Leaves of the signal peptide-like segment-deletion mutant *hpaXmΔLP* transformed line T<sub>1</sub>-103-5, and **c)** Leaves of the vector pBI121 transformed line T<sub>1</sub>-V35. Similar results were obtained from five sets of experiments, investigating a total of 67 plants of each genotype.

doi:10.1371/journal.pone.0170931.g008

progressively and expanded by 10 d to basal stems from inoculation sites in untransformed and Vec plants. In contrast, symptoms were restricted around inoculation sites or expanded slightly in transgenic tobacco expressing the full-length and the signal peptide-like segment-deleted mutant of *hpaXm* during the same period. Statistical analysis showed significant differences ( $P \leq 0.01$ ) between resistant transgenic plants and Vec control plants. Compared with the Vec control plants, the number of lesions on resistant *hpaXm* transgenics was reduced by 60.12% on average, and correspondingly reduced by about 56.67% for resistant *hpaXmΔLP* transgenics (Table 2, Fig 8). The results showed that the trans-gene expression of the full-length and the N-terminal signal peptide-like segment-deleted mutant of *hpaXm* significantly enhanced resistance to TMV in transgenic tobacco.

### Deletion of signal peptide-like segment prevented the *hpaXmΔLP* expressed protein moving to plant cell wall

The immune colloidal-gold tests showed colloidal-gold particles attached to the cytoplasm, the cell membrane, organelles (e.g. chloroplasts, mitochondria, and nucleus), and the cell wall on leaf tissues of every tested transgenic line that expressed the full-length *hpaXm*. Except for cell walls, colloidal-gold particles were detected in leaf tissues of every tested *hpaXmΔLP* transgenic line as for the full-length lines. For example, colloidal-gold particles were evenly distributed on the plasma membrane of transgenic leaf tissues, and some were clustered in twos and threes. Colloidal-gold particles were densely distributed in the sheet structure of chloroplasts, while patchily distributed in mitochondria at lower density. In particular, colloidal-gold particles were evenly attached to cell walls in *hpaXm* compared with *hpaXmΔLP* transgenic lines. Almost no colloidal-gold particles were observed on leaf tissues in Vec transgenic lines. (Fig 9)

**Table 2. Resistance levels of transgenic tobacco against TMV.**

| Plants                                  | TMV plant lesion number (X±SD) | Significance level ( $P \leq 0.01$ ) | Lesion reduction (%) |
|-----------------------------------------|--------------------------------|--------------------------------------|----------------------|
| The Control                             | 35.76±2.71                     | A                                    |                      |
| The transgenic <i>hpaXm</i> tobaccos    | 12.97±2.37                     | B                                    | 60.12                |
| The transgenic <i>hpaXmΔLP</i> tobaccos | 14.16±2.51                     | B                                    | 56.67                |

doi:10.1371/journal.pone.0170931.t002

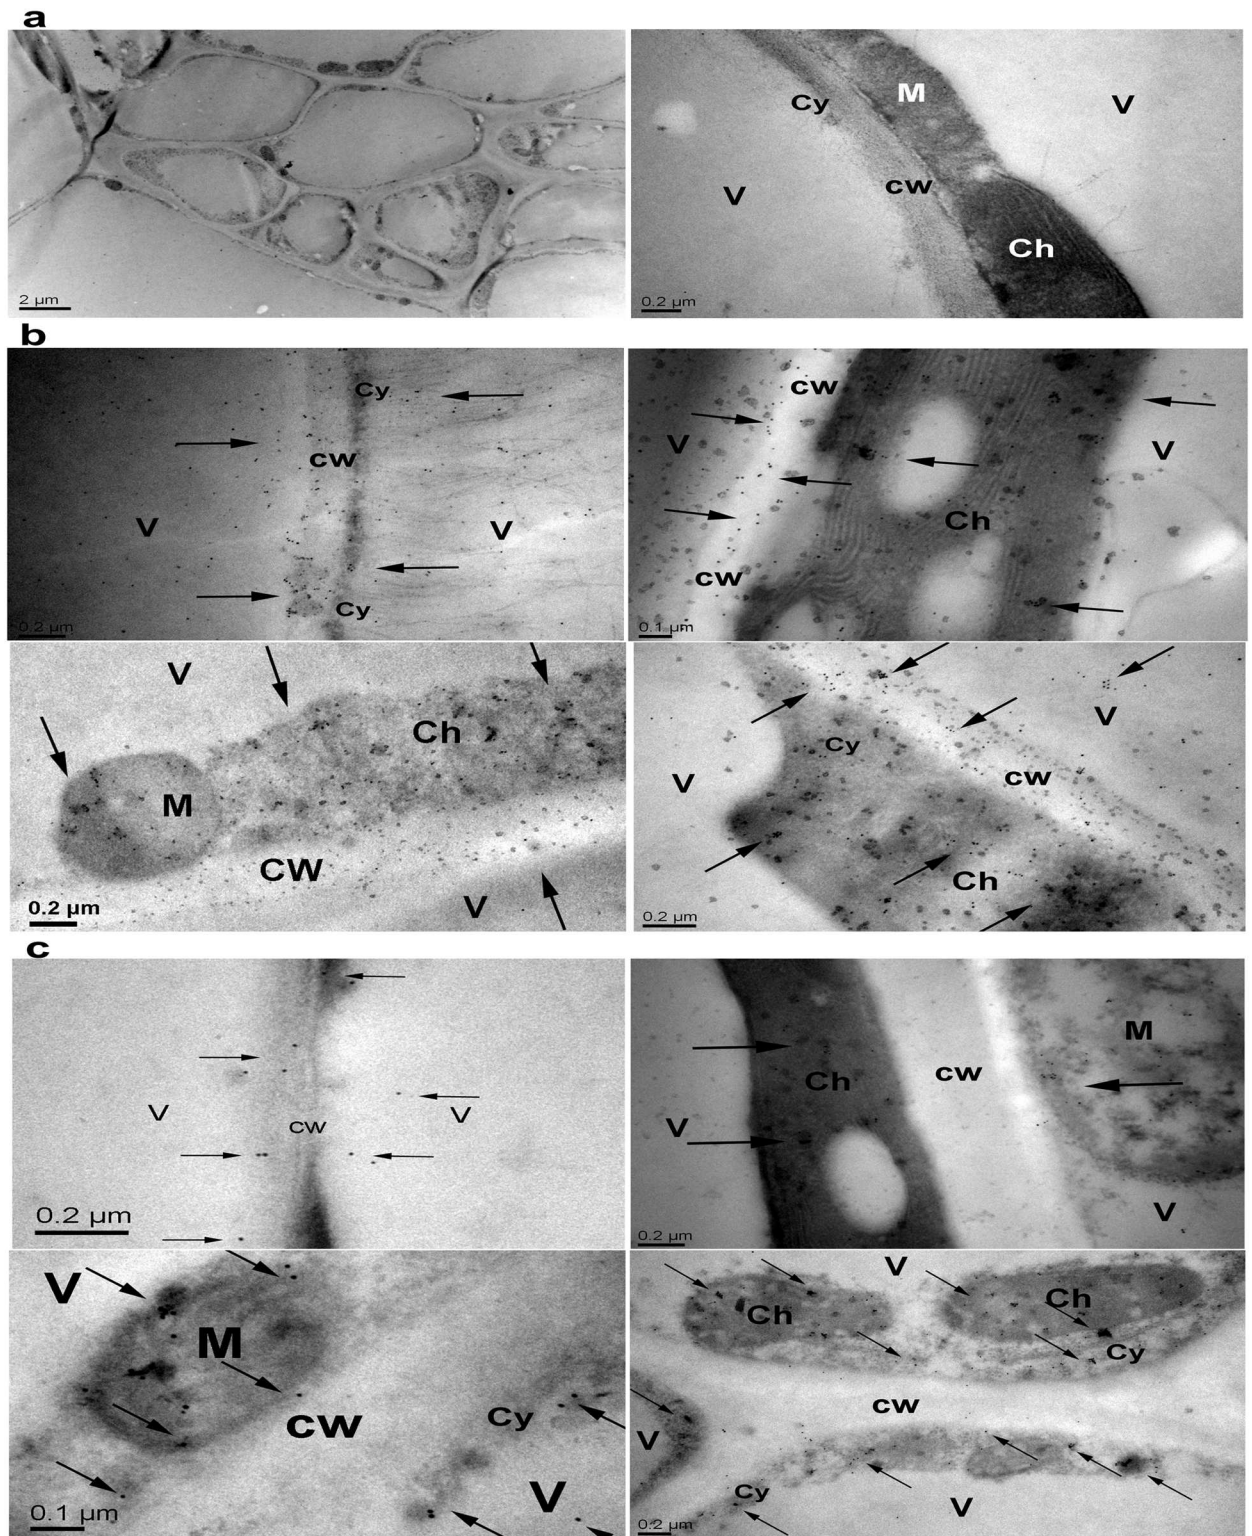

**Fig 9. Immunogold localization of the full-length and the signal peptide-like segment-deletion mutant of *hpaXm* in leaves.** a) Tobacco tissues of vector-transformed T<sub>1</sub>-V35, b) tobacco tissues of *hpaXm*-transformed T<sub>1</sub>-101-3, and c) tobacco tissues of *hpaXm*ΔLP-transformed T<sub>1</sub>-103-5 were pretreatment and observed with a JEM 1200ex transmission electron microscope (Leica, Germany). CW: Cell wall; Cy: Cytoplasm; V: Vacuole; Ch: Chloroplasts; M: Mitochondria. Arrows indicated the colloidal-gold particles (15-nm particles). More than 20 ultrathin sections of each sample were examined. The experiment was repeated twice with similar results.

doi:10.1371/journal.pone.0170931.g009

All the tests indicated that hpaXm and its residues were active intracellularly in transgenic lines. Additionally, the exogenously expressed full-length hpaXm was able to move out of the plasma membrane to the cell wall. However, the N-terminal signal peptide-like segment of *hpaXm* deletion resulted in transgene expressed hpaXmΔLP staying inside the plasma membrane.

## Discussion

Unlike other common harpins, HpaXm, is classified in another group in terms of its amino acid composition and some special characteristics [1], such as a putative signal peptide detected in the N-terminal leader peptide [20]. We generated different transgenic tobacco lines expressing the full-length and the N-terminal signal peptide-like segment-deleted mutant of *hpaXm* respectively. Transgenic plants expressing the *hpaXm* and *hpaXmΔLP* genes conferred disease resistance to selected pathogens.

Previously it was reported that several harpins could induce resistance to TMV in tobaccos [49]. In this paper, hpaXm also induced resistance when acting both intercellular and intracellular. Harpin genes are constitutively expressed in plant cells. When sprayed on plants, harpins could confer defense responses without HR cell death against diverse plant pathogens, including fungi, oomycetes, bacteria, and viruses [1]. For example, foliar application of the full-length Hpa1, and particularly the Hpa1<sub>10–42</sub> fragment, induced strong resistance in rice to *X. oryzae* pv. *oryzae* and *Magnaporthe grisea* in greenhouse and field conditions [15,17]. Similarly, transgenic rice expressing *hpa1* showed resistance to *M. grisea* [50–51]. Results in the present study supported the view that hpaXm, similar to other common harpins, enhanced the resistance of transgenic tobacco to TMV, even when the N-terminal signal peptide-like segment was deleted. Our data demonstrated that the N-terminal leader peptide (1-MNSLNTQIGANSSFL-15) of hpaXm was not the critical effector for the resistance. This was similar to the purified hpaXm proteins and the signal peptide-like segment-deletion mutant hpaXmΔLP proteins sprayed on tobacco leaf surfaces [18]. These results showed similar behavior to the harpin Ea, which imparted resistance to *P. infestans* [52] and *P. nicotianae* [29], regardless of whether *hrpN* was fused with a signal peptide-encoding sequence. All harpins reported so far, except XopA of *X. campestris* pv. *vesicatoria* [53] and truncated HrpZ1 of *P. syringae* pv. *tabaci* [54], can induce HR in tobacco following infiltration of leaf panels [1]. In this paper, the trans-gene expressed hpaXm and hpaXmΔLP in transgenic tobacco were as active as the recombinant hpaXm and hpaXmΔLP proteins v, being able to elicit HR on tobacco leaves even after they were boiled [20]. Additionally, there was no large area of visible necrotic spots induced in transgenic plants, possibly due to their lower expression level of the foreign genes. However, after staining with trypan blue, micro-HR was observed in transgenic tobacco leaves. The results were similar to the phenotype of transgenic cottons expressing the full-length and partial fragments of harpin<sub>Xoo</sub> [55]. Firstly, this demonstrated that endogenous expression of hpaXm induced defensive responses in plants with cell death, and the N-terminal leader peptide (1-MNSLNTQIGANSSFL-15) was not sufficient for HR elicitation. Secondly, it demonstrated the heat stability of hpaXm.

There are some controversies concerning the association and interaction sites of harpins. Some evidence demonstrated that several harpins can bind to lipids and form pores in the plant plasma membrane [1], and other evidence indicated that the association site of harpins with plants is also in the cell wall [20, 28, 56–57]. In our previous works, hpa1<sub>Xoo</sub> were found to accumulate along the cell walls of the transgenic cotton where it could trigger the generation of H<sub>2</sub>O<sub>2</sub> as a cell wall endogenous elicitor, but only a few found in cell membranes and chloroplasts and none in the mitochondria [21–22]. HpaXm homolog hpa1 is from *X. oryzae* pv. *oryzae* [8, 58] and doesn't own a putative signal leader like hpaXm has [8, 59]. The results of the

associations of hpaXm in transgenic tobaccos in this paper show some differences mainly because hpaXm is identified into the group distinct from the Hpa1 group as the glycine ratio of hpaXm is relatively lower than hpa1 and hpa1 carries one cysteine but hpaXm carries four cysteines [1]. Another reason may be different plants used in the experiments with hpa1Xoo in cottons while hpaXm in tobaccos. In addition, the N-terminal leader peptide of several harpins plays an important role in transferring harpins. Therefore, the N-terminal leader peptide of hpaXm probably guided the hpaXm residues transferring from one site to another. Referring to the association sites of the full-length and the N-terminal leader peptide (1-MNSLNTQIGANSSFL-15) deletion mutant of *hpaXm* in transgenic tobacco tissues, deletion of the N-terminal leader peptide segment prevented the hpaXm-deleted residues being transported outside the plasma membrane. The results demonstrated our inference that the N-terminal leader peptide (1-MNSLNTQIGANSSFL-15) of hpaXm guided the residues to associate to the cell wall. Thus, we predicted that hpaXm without the signal peptide could not be translocated to the surface of the leaves.

Previously, association of harpins with the plant plasma membrane was shown by examining the ability of harpins to form pores in artificial membranes, similar to the translocator proteins of animal-pathogenic bacteria [60]; and, additionally, the ability of harpins to bind to lipids. Data from several groups indicated that several harpins can bind to lipids and form pores in the plant plasma membrane [1]. PopA1 from *R. solanacearum* was shown to be integrated into liposomes and also into membranes from *Xenopus laevis* oocytes, resulting in formation of ion-conducting pores [27]. In this study, it is not clear why the N-terminal leader peptide of HpaXm is critical for hpaXm transfer to the cell wall. Additionally, how the N-terminal leader peptide or the signal peptide-like segment of hpaXm influences the association sites, the interaction sites and the translocation of hpaXm in plants remains unclear. Study of the association mechanism of hpaXm within host or non-host plants will help us further understand the interactions between harpins, plant pathogens and plants. Thus, more assays of hpaXm binding with plants or pathogens should be done in the future.

## Conclusion

The N-terminal leader peptide (1-MNSLNTQIGANSSFL-15) was not necessary for trans-gene expressed hpaXm to elicit HR on tobacco leaves, to induce micro-HR in transgenic tobacco and to enhance the resistance of transgenic tobacco to TMV. However, the leader peptide was critical for the expressed hpaXm to be transported outside the plasma membranes of transgenic tobacco leaf tissues. Additionally, the N-terminal leader peptide (1-MNSLNTQIGANSSFL-15) of hpaXm acted as a signal peptide in transgenic tobacco, helping hpaXm to associate to the cell wall.

## Open access

The data sets supporting the results of this article are included within the article and its additional files. The microarray data supporting the results of this article are available in the NCBI's Gene Expression Omnibus repository, and are accessible through GenBank accession numbers DQ643828 (<http://www.ncbi.nlm.nih.gov/nuccore/109648387/>), AF485783 (<http://www.ncbi.nlm.nih.gov/nuccore/AF485783>), and AJ223969 (<http://www.ncbi.nlm.nih.gov/nuccore/AJ223969>).

## Acknowledgments

This work was supported by the National Natural Science Foundation of China (31360029) and The Research Fund for the Doctoral Program of Higher Education of China (20124601110004).

The studies were conceived and planned by WG Miao; L Li carried out the molecular genetic studies and the transgenic related works, participated in the sequence alignment, the protein analysis and the TMV inoculation, and simultaneously drafted the manuscript. WG Miao participated in the design of the study. L Li performed the statistical analysis and took part in the protein analysis and the virus inoculation. The manuscript was edited and prepared by L Li, and was reviewed by SJ Zhang along with WG Miao. WB Liu managed the laboratory and custodies all the experimental materials. All authors read and approved the final manuscript. Special thanks to Yunqin Li, ZheJiang University, for helping with the immuno-colloidal gold test.

## Author Contributions

**Conceptualization:** WM LL.

**Data curation:** LL.

**Formal analysis:** LL.

**Funding acquisition:** WM.

**Investigation:** LL.

**Methodology:** WM LL.

**Project administration:** WM LL.

**Resources:** WM LL.

**Software:** WL.

**Supervision:** WM LL.

**Validation:** LL.

**Visualization:** WM LL.

**Writing – original draft:** WM LL.

**Writing – review & editing:** WM LL SZ.

## References

1. Choi MS, Kim W, Lee C, Oh CS. Harpins. Multifunctional Proteins Secreted by Gram-Negative Plant-Pathogenic Bacteria. *MPMI*. 2013; 1: 54–62
2. Wei ZM, Beer SV. HrpI of *Erwinia amylovora* functions in secretion of harpin and is a member of a new protein family. *J. Bacteriol.* 1993; 175(24): 7958–7967 PMID: [8253684](#)
3. Peng JL, Bao ZL, Ren HY, Wang JS, Dong HS. Expression of harpin(xoo) in transgenic tobacco induces pathogen defense in the absence of hypersensitive cell death. *Phytopathology*. 2004; 94:1048–1055 doi: [10.1094/PHYTO.2004.94.10.1048](#) PMID: [18943792](#)
4. Sohn SI, Kim YH, Kim BR, Lee SY, Lim CK, Hur JH, et al. Transgenic tobacco expressing the hrpN(EP) gene from *Erwinia pyrifoliae* triggers defense responses against *Botrytis cinerea*. *Mol. Cells*. 2007; 24:232–239 PMID: [17978576](#)
5. Dong H, Delaney TP, Bauer DW, Beer SV. Harpin induces disease resistance in *Arabidopsis* through the systemic acquired resistance pathway mediated by salicylic acid and the *NIM1* gene. *Plant J*. 1999; 20:207–215 PMID: [10571880](#)
6. Dong HP, Peng J, Bao Z, Meng X, Bonasera JM, Chen G, et al. Downstream divergence of the ethylene signaling pathway for harpin-stimulated *Arabidopsis* growth and insect defense. *Plant Physiol*. 2004; 136:3628–3638 doi: [10.1104/pp.104.048900](#) PMID: [15516507](#)
7. Dong HP, Yu H, Bao Z, Guo X, Peng J, Yao Z, et al. The ABI2-dependent abscisic acid signalling controls HrpN-induced drought tolerance in *Arabidopsis*. *Planta*. 2005; 221: 313–327 doi: [10.1007/s00425-004-1444-x](#) PMID: [15599761](#)

8. Miao WG, Wang JS. HpaXm from *Xanthomonas smithii* pv. *smithii* is a novel harpin protein with signal peptide. *Amino Acids*. 2009; S:120–121
9. Mudgett MB, Chesnokova O, Dahlbeck D, Clark ET, Rossier O, Bonas U, et al. Molecular signals required for type III secretion and translocation of the *Xanthomonas campestris* AvrBs2 protein to pepper plants. *PNAS*. 2000; 97: 13324–13329 doi: [10.1073/pnas.230450797](https://doi.org/10.1073/pnas.230450797) PMID: [11078519](https://pubmed.ncbi.nlm.nih.gov/11078519/)
10. Schechter LM, Roberts KA, Jamir Y, Alfano JR, Collmer A. Pseudomonas syringae type III secretion system targeting signals and novel effectors studied with a Cya translocation reporter. *J. Bacteriol*. 2004; 186: 543–555 doi: [10.1128/JB.186.2.543-555.2004](https://doi.org/10.1128/JB.186.2.543-555.2004) PMID: [14702323](https://pubmed.ncbi.nlm.nih.gov/14702323/)
11. Wang XY, Li M, Zhang JH, Zhang Y, Zhang GY, Wang JS. Identification of a key functional region in harpins from *Xanthomonas* that suppresses protein aggregation and mediates harpin expression in *E. coli*. *Mol. Bio. Reports*. 2007; 3: 189–198
12. Wang XY, Song CF, Miao WG, Ji ZL, Wang XB, Zhang Y, et al. Mutations in the N-terminal coding region of the harpin protein Hpa1 from *Xanthomonas oryzae* cause loss of hypersensitive reaction induction in tobacco. *Appl. Microbiol. Biotechnology*. 2008; 81:359–369
13. Li XJ, Han B, Xu MY, Han LP, Zhao YY, Liu ZL, et al. Plant growth enhancement and associated physiological responses are coregulated by ethylene and gibberellin in response to harpin protein Hpa1. *Planta*. 2014; 239(4):831–846 doi: [10.1007/s00425-013-2013-y](https://doi.org/10.1007/s00425-013-2013-y) PMID: [24395199](https://pubmed.ncbi.nlm.nih.gov/24395199/)
14. Wu XJ, Wu TQ, Long JY, Yin Q, Zhang Y, Chen L, et al. Productivity and biochemical properties of green tea in response to a bacterial type-III effector protein and its variants. *J. Biosci*. 2007; 32:1119–1132
15. Chen L, Qian J, Qu SP, Yin Q, Qian J, Wu X, et al. A fragment of the *Xanthomonas oryzae* pv. *oryzicola* harpin HpaGXooc reduces disease and increases yield of rice in extensive grower plantings. *Phytopathology*. 2008b; 98:792–802
16. Fu MQ, Xu MY, Zhou T, Wang DF, Tian S, Han LP, et al. Transgenic expression of a functional fragment of harpin protein Hpa1 in wheat induces the phloem-based defence against English grain aphid. *J. Exp. Bot*. 2014; 65 (6):1439–1453 doi: [10.1093/jxb/ert488](https://doi.org/10.1093/jxb/ert488) PMID: [24676030](https://pubmed.ncbi.nlm.nih.gov/24676030/)
17. Chen L, Qian J, Qu SP, Long J, Yin Q, Zhang C, et al. Identification of specific fragments of HpaGXooc, a harpin from *Xanthomonas oryzae* pv. *oryzicola*, that induce disease resistance and enhance growth in plants. *Phytopathology*. 2008a; 98:781–791
18. Kim JF, Beer SV, HrpW of *Erwinia amylovora*, a new harpin that contains a domain homologous to pectate lyases of a distinct class. *J. Bacteriol*. 1998; 180:5203–5210 PMID: [9748455](https://pubmed.ncbi.nlm.nih.gov/9748455/)
19. Charkowski AO, Alfano JR, Preston G, Yuan J, He SY, Collmer A, The *Pseudomonas syringae* pv. *tomato* HrpW protein has domains similar to harpins and pectate lyases and can elicit the plant hypersensitive response and bind to pectate. *J. Bacteriol*. 1998; 180:5211–5217 PMID: [9748456](https://pubmed.ncbi.nlm.nih.gov/9748456/)
20. Miao WG. Defensive responses and genome-wide transcriptome in transgenic cotton expressing *Xanthomonas oryzae* Hpa1Xoo gene and characterization of the hpaXm gene in *X. citri* subsp. *Malvacearum*. Thesis, Nanjing Agricultural University. 2009.
21. Miao W, Wang X, Song C, Wang Y, Ren Y, Wang J. Transcriptome analysis of Hpa1Xoo transformed cotton revealed constitutive expression of genes in multiple signaling pathways related to disease resistance. *J. Exp. Bot*. 2010; 61:4263–4275 doi: [10.1093/jxb/erq227](https://doi.org/10.1093/jxb/erq227) PMID: [20667962](https://pubmed.ncbi.nlm.nih.gov/20667962/)
22. Miao WG, Wang XB, Li M, Song CF, Wang Y, Hu DW, et al. Genetic transformation of cotton with a harpin-encoding gene hpaXoo confers an enhanced defense response against different pathogens through a priming mechanism. *BMC Plant Biology*. 2010; 10(67)
23. Douglas CM, Guidi-Rontani C, Collier RJ. Exotoxin A of *Pseudomonas aeruginosa*: Active, Cloned Toxin Is Secreted into the Periplasmic Space of *Escherichia coli*. *J. Bacteriol*. 1987; 11: 4962–4966
24. Economou A. Bacterial protein translocase: a unique molecular machine with an army of substrates. *FEBS Lett*. 2000; 1(2): 18–21
25. Montagner C, Arquint C, Cornelis GR. Translocators YopB and YopD from *Yersinia enterocolitica* form a multimeric integral membrane complex in eukaryotic cell membranes. *J. Bacteriol*. 2011; 193:6923–6928 doi: [10.1128/JB.05555-11](https://doi.org/10.1128/JB.05555-11) PMID: [22001511](https://pubmed.ncbi.nlm.nih.gov/22001511/)
26. Lee J, Klessig DF, Nurnberger T. A harpin binding site in tobacco plasma membranes mediates activation of the pathogenesis-related gene *HIN1* independent of extracellular calcium but dependent on mitogen-activated protein kinase activity. *Plant Cell*. 2001; 13:1079–1093 PMID: [11340183](https://pubmed.ncbi.nlm.nih.gov/11340183/)
27. Racape J, Belbahri L, Engelhardt S, Lacombe B, Lee J, Lochman J, et al. Ca<sup>2+</sup>-dependent lipid binding and membrane integration of PopA, a harpin-like elicitor of the hypersensitive response in tobacco. *Mol. Microbiol*. 2005; 58:1406–1420 doi: [10.1111/j.1365-2958.2004.04910.x](https://doi.org/10.1111/j.1365-2958.2004.04910.x) PMID: [16313625](https://pubmed.ncbi.nlm.nih.gov/16313625/)
28. Li JG, Liu HX, Cao J, Chen LF, Gu C, Allen C, et al. PopW of *Ralstonia solanacearum*, a new two-domain harpin targeting the plant cell wall. *Mol. Plant Pathol*. 2010; 11:371–381 doi: [10.1111/j.1364-3703.2010.00610.x](https://doi.org/10.1111/j.1364-3703.2010.00610.x) PMID: [20447285](https://pubmed.ncbi.nlm.nih.gov/20447285/)



29. Dong H, Beer SV. Riboflavin induces disease resistance in plants by activating a novel signalxd transduction pathway. *Phytopathology*. 2000; 90(8):801–811 doi: [10.1094/PHYTO.2000.90.8.801](https://doi.org/10.1094/PHYTO.2000.90.8.801) PMID: [18944500](https://pubmed.ncbi.nlm.nih.gov/18944500/)
30. Gerhardt P, Murray R GE, Costilow RN, Nester EW, Wood WA, Krieg NR, et al. *Manual of Methods for General Bacteriology*. American Society of Microbiology USA; 1981.
31. Kim JG, Park BK, Yoo CH, Jeon E, Oh J, Hwang I. Characterization of the *Xanthomonas axonopodis* pv. *glycines* Hrp pathogenicity island. *J. Bacteriol*. 2003; 185:3155–3166 doi: [10.1128/JB.185.10.3155-3166.2003](https://doi.org/10.1128/JB.185.10.3155-3166.2003) PMID: [12730176](https://pubmed.ncbi.nlm.nih.gov/12730176/)
32. Clark MS. *Plant Molecular Biology. A Laboratory Manual*. Springer- Verlag, Berlin; 1997.
33. Yu YZ, Du J, Wang G. Agrobacterium freeze-thaw method of introducing a recombinant plasmid. *J. of Jilin Agricultural University*. 2003; 25(3): 257–259, 262
34. Jefferson RA, Kavanagh TA, Bevan MW. Gus fusions:  $\beta$ -glucuronidase as a sensitive and versatile gene fusion marker in higher plants. *EMBO J*. 1987; 6: 3901 PMID: [3327686](https://pubmed.ncbi.nlm.nih.gov/3327686/)
35. Lazo GR, Stein PA, Ludwig RA. A DNA transformation-competent *Arabidopsis* genomic library in *Agrobacterium*. *Bio-technology*. 1991; 9: 963–973 PMID: [1368724](https://pubmed.ncbi.nlm.nih.gov/1368724/)
36. Sambrook J, Russell DW. *Molecular Cloning: A Laboratory Manual*. 3rd ed. Cold Spring Harbor Laboratory, Cold Spring Harbor, NY. 2001.
37. Peng JL, Dong HS, Dong HP, Delaney TP, Bonasera BM, Beer SV. Harpin-elicited hypersensitive cell death and pathogen resistance requires the *NDR1* and *EDS1* genes. *Physiol. Mol. Plant Pathol*. 2003; 62:317–326
38. Bollag DM, Rozycki MD, Edelstein SJ. *Protein Methods*. 2nd ed. Wiley-Liss, New York; 1996.
39. Wei ZM, Lacy RJ, Zumoff CH, Bauer DW, He SY, Collmer A, et al., Harpin, elicitor of the hypersensitive response produced by the plant pathogen *Erwinia amylovora*. *Science*. 1992; 257:85–88 PMID: [1621099](https://pubmed.ncbi.nlm.nih.gov/1621099/)
40. Dong H, Delaney TP, Bauer DW, Beer SV. Harpin induces disease resistance in *Arabidopsis* through the systemic acquired resistance pathway mediated by salicylic acid and the NIM1 gene. *Plant J*. 1999; 20:207–215 PMID: [10571880](https://pubmed.ncbi.nlm.nih.gov/10571880/)
41. Alvarez ME, Pennell RL, Meijer RJ, Ishikawa A, Dixon RA, Lamb C, Reactive oxygen intermediates mediate a systemic signal network in the establishment of plant immunity. *Cell*. 1998; 92:773–784 PMID: [9529253](https://pubmed.ncbi.nlm.nih.gov/9529253/)
42. Uknes S, Mauch-Mani B, Moyer M, Potter S, Williams S, Dincher S, et al. Acquired resistance in *Arabidopsis*. *Plant Cell*. 1992; 4:645–656 doi: [10.1105/tpc.4.6.645](https://doi.org/10.1105/tpc.4.6.645) PMID: [1392589](https://pubmed.ncbi.nlm.nih.gov/1392589/)
43. Klement Z, Rudolph K, Sands DC. *Methods in phytobacteriology*. 1990; 568.
44. De Mey J, Lambert AM Bajer AS Moeremans M, Brabander MD. Visualization of microtubules in interphase and mitotic plant cells of *Haemanthus endosperm* with the immuno-gold staining method. *PNAS*. 1982; 79 (6)
45. Li L. Effect of the presumed signal peptide sequence on hpaXm expression in transgenic tobaccos and its action sites. Thesis, Hainan University. 2015.
46. Berberich T, Sugawara K, Harada M, Kusano T. Molecular cloning, characterization and expression of an elongation factor 1 $\alpha$  gene in maize. *Plant Mol. Biol*. 1995; 28:611–615
47. Gallie DR, Le H, Caldwell C, Browning KS. Analysis of translation elongation factors from wheat during development and flowering heat shock. *Biochem. Biophys. Res. Commun*. 1998; 245:295–300 doi: [10.1006/bbrc.1998.8427](https://doi.org/10.1006/bbrc.1998.8427) PMID: [9571144](https://pubmed.ncbi.nlm.nih.gov/9571144/)
48. Walker JM. The bicinchoninic acid (BCA) assay for protein quantitation. *J. The Protein Protocols Handbook*. 2009; 11–15.
49. Strobel RN, Gopalan JS, Kuc JA, He SY. Induction of systemic acquired resistance in cucumber by *Pseudomonas syringae* pv. *syringae* 61 HrpZPss protein. *Plant J*. 1996; 9:431–439.
50. Choi MS, Heu S, Pack NC, Koh HJ, Lee JS, Oh CS. Ectopic expression of *hpa1* gene of *Xanthomonas oryzae* pv. *Oryzae* encoding a bacterial harpin protein enhances disease resistance to both fungal and bacterial pathogens in rice and *Arabidopsis*. *Plant Pathol. J*. 2012; 28:364–372
51. Shao M, Wang J, Dean RA, Lin Y, Gao X, Hu S. Expression of a harpin-encoding gene in rice confers durable nonspecific resistance to *Magnaporthe grisea*. *Plant Biotechnol. J*. 2008; 6:73–81 doi: [10.1111/j.1467-7652.2007.00304.x](https://doi.org/10.1111/j.1467-7652.2007.00304.x) PMID: [18005094](https://pubmed.ncbi.nlm.nih.gov/18005094/)
52. Li R, Fan Y. Reduction of lesion withrate of late blight plant disease intransgenic potato expressing harpin protein. *Sci.China (Scr.C)*. 1999; 42: 96–106
53. Kim JG, Jeon E, Oh J, Moon JS, Huang I. Mutational analysis of *Xanthomonas* harpin HpaG identifies a key functional region that elicits the hypersensitive response in nonhost plants. *J. Bacteriol*. 2004; 186:6239–6247 doi: [10.1128/JB.186.18.6239-6247.2004](https://doi.org/10.1128/JB.186.18.6239-6247.2004) PMID: [15342594](https://pubmed.ncbi.nlm.nih.gov/15342594/)

54. Tsunemi K, Taguchi F, Marutani M, Watanabe-Sugimoto M, Inagaki Y, Toyoda K et al. Degeneration of *hrpZ* gene in *Pseudomonas syringae* pv. *tabaci* to evade tobacco defence: An arms race between tobacco and its bacterial pathogen. *Mol. Plant Pathol.* 2011; 12:709–714 doi: [10.1111/j.1364-3703.2011.00705.x](https://doi.org/10.1111/j.1364-3703.2011.00705.x) PMID: [21726372](https://pubmed.ncbi.nlm.nih.gov/21726372/)
55. Meng FH. Study on the transgenic tobacco expressing harpinXoo and its two deletion derivatives. Thesis, Nanjing Agricultural University. 2007.
56. Hoyos AE, Stanley CM, He SY, Pike S, Pu XA, Novaeky A. The interaction of harpinPss with Plant cell walls. *MPMI.* 1996; pp. 608–616.
57. Brown IR, Mansfield JW, Taira S, Roine E, Romantsehuk M. Immuno cytochemical localization of HrpA and HrpZ supports a role for the Hrp Pilus in the Transfer of Effector Proteins from *Pseudomonas syringae* Pv. Tomato Across the Host Plant Cell Wall. *MPMI.* 2001; 14(3): 394–04 doi: [10.1094/MPMI.2001.14.3.394](https://doi.org/10.1094/MPMI.2001.14.3.394) PMID: [11277437](https://pubmed.ncbi.nlm.nih.gov/11277437/)
58. Emanuelsson O, Brunak S, Heijne GV, Nielsen H. Locating proteins in the cell using TargetP, SignalP, and related tools. *Nat. Protoc.* 2007; 2: 953–971 doi: [10.1038/nprot.2007.131](https://doi.org/10.1038/nprot.2007.131) PMID: [17446895](https://pubmed.ncbi.nlm.nih.gov/17446895/)
59. Noel L, Thieme F, Nennstiel D, Bonas U. Two novel type III-secreted proteins of *Xanthomonas campestris* pv. *vesicatoria* are encoded within the *hrp* pathogenicity island. *J. Bacteriol.* 2002; 184: 1340–1348 doi: [10.1128/JB.184.5.1340-1348.2002](https://doi.org/10.1128/JB.184.5.1340-1348.2002) PMID: [11844763](https://pubmed.ncbi.nlm.nih.gov/11844763/)
60. Neyt C, Cornelis GR. Insertion of a Yop translocation pore into the macrophage plasma membrane by *Yersinia enterocolitica*: Requirement for translocators YopB and YopD, but not LcrG. *Mol. Microbiol.* 1999; 33:971–981 PMID: [10476031](https://pubmed.ncbi.nlm.nih.gov/10476031/)
